# Supplementary material for: Evaluation of the Risk Factors for Cellulitis among Patients with Peripheral Artery Disease
Source: MDPI journal article supplement (doi:10.3390/medicina59050933), 2023-05-12
Supplement: s1 [file s1]

**Supplementary Table S1.** Disease code of comorbidities.

| Disease                      | ICD-9-CM                                              |
|------------------------------|-------------------------------------------------------|
| Hypertension                 | 401–405                                               |
| Hyperlipidemia               | 272.0–272.4                                           |
| Diabetes                     | 250                                                   |
| Hyperthyroidism              | 242                                                   |
| Hypothyroidism               | 243, 244                                              |
| Rheumatoid arthritis         | 714.0                                                 |
| Systemic lupus erythematosus | 710.0                                                 |
| Sjogren’s syndrome           | 710.2                                                 |
| Ankylosing spondylitis       | 720.0                                                 |
| Chronic pulmonary disease    | 490–496, 500–505, 506.4                               |
| Renal disease                | 582, 583.0–583.7, 585, 586, 588                       |
| Liver disease                | 456.0–456.21, 571.2, 571.4, 571.5, 571.6, 572.2–572.8 |

**Supplementary Table S2.** Sensitivity analysis of demographic characteristics of PAOD and Non-PAOD.

|                              | Before PSM matching |      |               |      |        | After PSM matching |      |               |      |        |
|------------------------------|---------------------|------|---------------|------|--------|--------------------|------|---------------|------|--------|
|                              | Non-PAOD            |      | PAOD          |      | ASD    | PAOD               |      | Non-PAOD      |      |        |
|                              | (N = 121324)        |      | (N =30331)    |      |        | (N = 29007)        |      | (N = 29007)   |      |        |
|                              | n                   | %    | n             | %    |        | n                  | %    | n             | %    |        |
| Age                          |                     |      |               |      | <0.001 |                    |      |               |      | <0.001 |
| 20-40                        | 8312                | 6.9  | 2078          | 6.9  |        | 1915               | 6.6  | 2023          | 7.0  |        |
| 40-60                        | 54332               | 44.8 | 13583         | 44.8 |        | 12964              | 44.7 | 13001         | 44.8 |        |
| ≥60                          | 58680               | 48.4 | 14670         | 48.4 |        | 14128              | 48.7 | 13983         | 48.2 |        |
| Mean ± SD                    | 62.95 ± 14.48       |      | 62.95 ± 14.48 |      | <0.001 | 63.75 ± 14.03      |      | 62.84 ± 14.55 |      | 0.063  |
| Sex                          |                     |      |               |      | <0.001 |                    |      |               |      | 0.008  |
| Female                       | 63468               | 52.3 | 15867         | 52.3 |        | 15380              | 53.0 | 15269         | 52.6 |        |
| Male                         | 57856               | 47.7 | 14464         | 47.7 |        | 13627              | 47.0 | 13738         | 47.4 |        |
| Hypertension                 | 36460               | 30.1 | 14700         | 48.5 | 0.384  | 13849              | 47.7 | 13702         | 47.2 | 0.010  |
| Hyperlipidemia               | 13633               | 11.2 | 5863          | 19.3 | 0.226  | 5622               | 19.4 | 5562          | 19.2 | 0.005  |
| Diabetes                     | 14823               | 12.2 | 8382          | 27.6 | 0.393  | 7387               | 25.5 | 7384          | 25.5 | <0.001 |
| Hyperthyroidism              | 720                 | 0.6  | 238           | 0.8  | 0.023  | 227                | 0.8  | 229           | 0.8  | 0.001  |
| Hypothyroidism               | 511                 | 0.4  | 172           | 0.6  | 0.021  | 157                | 0.5  | 159           | 0.5  | 0.001  |
| Rheumatoid Arthritis         | 668                 | 0.6  | 356           | 1.2  | 0.067  | 351                | 1.2  | 335           | 1.2  | 0.005  |
| Systemic lupus erythematosus | 88                  | 0.1  | 75            | 0.2  | 0.044  | 57                 | 0.2  | 59            | 0.2  | 0.002  |
| Sjogren’s syndrome           | 465                 | 0.4  | 212           | 0.7  | 0.043  | 209                | 0.7  | 203           | 0.7  | 0.002  |
| Ankylosing spondylitis       | 133                 | 0.1  | 74            | 0.2  | 0.032  | 62                 | 0.2  | 69            | 0.2  | 0.005  |
| Chronic pulmonary disease    | 9898                | 8.2  | 3823          | 12.6 | 0.146  | 3634               | 12.5 | 3620          | 12.5 | 0.001  |
| Liver disease                | 4946                | 4.1  | 2012          | 6.6  | 0.114  | 2001               | 6.9  | 1912          | 6.6  | 0.012  |
| CLTI                         | 66                  | 0.1  | 701           | 2.3  | 0.210  | 66                 | 0.2  | 67            | 0.2  | 0.001  |
| Hypoglycemic drugs           | 14197               | 11.7 | 8121          | 26.8 | 0.390  | 7195               | 24.8 | 7153          | 24.7 | 0.003  |
| Statin                       | 11259               | 9.3  | 5206          | 17.2 | 0.234  | 4896               | 16.9 | 4824          | 16.6 | 0.007  |
| ESRD                         | 446                 | 0.4  | 1217          | 4.0  | 0.251  | 446                | 1.5  | 489           | 1.7  | 0.012  |

ASD: Absolute standardized difference; PAOD: Peripheral Arterial Occlusion Disease; CLTI: Chronic limb Threatening ischaemia; ESRD: End-Stage Renal Disease.

**Supplementary Table S3.** Sensitivity analysis of Cox proportional hazard model analysis for risk of cellulitis.

|                              | Univariate       |         | Multivariate†    |         |
|------------------------------|------------------|---------|------------------|---------|
|                              | HR (95% C.I.)    | p value | HR (95% C.I.)    | p value |
| Group                        |                  |         |                  |         |
| Non-PAOD                     | Reference        |         | Reference        |         |
| PAOD                         | 1.79 (1.73-1.86) | <.0001  | 1.85 (1.78-1.92) | <.0001  |
| Age                          |                  |         |                  |         |
| 20-40                        | Reference        |         | Reference        |         |
| 40-60                        | 1.47 (1.35-1.61) | <.0001  | 1.29 (1.18-1.41) | <.0001  |
| ≥60                          | 2.30 (2.11-2.51) | <.0001  | 1.85 (1.69-2.02) | <.0001  |
| Sex                          |                  |         |                  |         |
| Female                       | Reference        |         | Reference        |         |
| Male                         | 1.16 (1.12-1.21) | <.0001  | 1.14 (1.10-1.18) | <.0001  |
| Hypertension                 | 1.40 (1.35-1.45) | <.0001  | 1.12 (1.08-1.16) | <.0001  |
| Hyperlipidemia               | 1.12 (1.07-1.18) | <.0001  | 0.93 (0.88-0.99) | 0.013   |
| Diabetes                     | 1.68 (1.62-1.75) | <.0001  | 1.14 (1.04-1.24) | 0.004   |
| Hyperthyroidism              | 1.04 (0.85-1.27) | 0.691   | 1.13 (0.93-1.38) | 0.227   |
| Hypothyroidism               | 1.03 (0.79-1.33) | 0.838   | 1.02 (0.79-1.32) | 0.891   |
| Rheumatoid Arthritis         | 1.42 (1.23-1.64) | <.0001  | 1.38 (1.19-1.60) | <.0001  |
| Systemic lupus erythematosus | 1.42 (1.01-1.99) | 0.041   | 1.63 (1.17-2.29) | 0.005   |
| Sjogren's syndrome           | 1.11 (0.90-1.38) | 0.341   | 1.05 (0.84-1.30) | 0.681   |
| Ankylosing spondylitis       | 1.70 (1.25-2.32) | <0.001  | 1.69 (1.24-2.29) | <0.001  |
| Chronic pulmonary disease    | 1.46 (1.39-1.53) | <.0001  | 1.29 (1.22-1.35) | <.0001  |
| Liver disease                | 1.17 (1.09-1.25) | <.0001  | 1.11 (1.04-1.19) | 0.003   |
| CLTI                         | 4.30 (3.33-5.55) | <.0001  | 3.79 (2.93-4.90) | <.0001  |
| Hypoglycemic drugs           | 1.72 (1.65-1.79) | <.0001  | 1.43 (1.31-1.56) | <.0001  |
| Statin                       | 1.20 (1.14-1.25) | <0.001  | 1.00 (0.94-1.06) | 0.938   |
| ESRD                         | 2.12 (1.87-2.41) | <.0001  | 2.01 (1.77-2.28) | <.0001  |

HR: Hazard Ratio; CI: Confidence Interval; PAOD: Peripheral Arterial Occlusion Disease; CLTI: Chronic limb Threatening ischaemia; ESRD: End-Stage Renal Disease; †Adjusted for age, sex, hypertension, hyperlipidemia, diabetes, hyperthyroidism, hypothyroidism, rheumatoid arthritis, systemic lupus erythematosus, Sjogren's syndrome, ankylosing spondylitis, chronic pulmonary disease, liver disease, chronic limb threatening ischaemia, hypoglycemic drugs, statin, and end-stage renal disease.
